# Supplementary material for: Anion-dependent assemblies of a series of Cd(ii) coordination complexes based on an asymmetric multi-dentate ligand and inorganic SBUs: syntheses, crystal structures, and fluorescent properties
Source: Royal Society of Chemistry journal article supplement (doi:10.1039/c4ce01456a), 2014-01-01
Supplement: c4ce01456a1.pdf [file c4ce01456a1.pdf]

## Supplementary materials

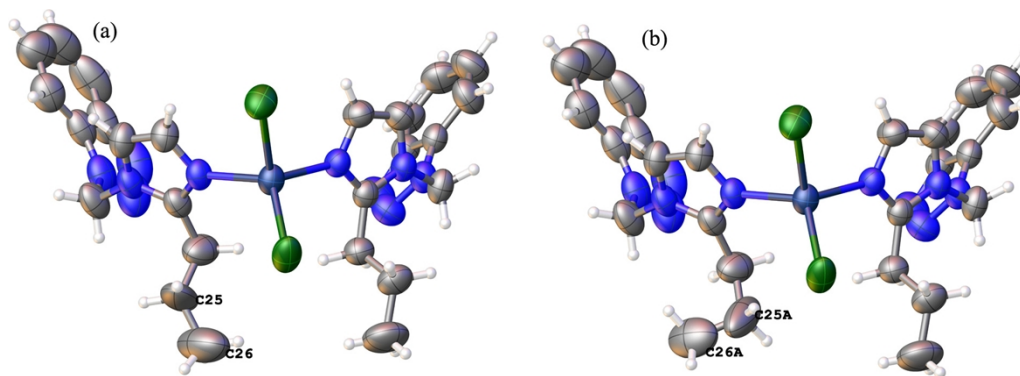

**Fig. S1** Showing **1** exhibits the disorder in the terminal group of the bpmi ligand.

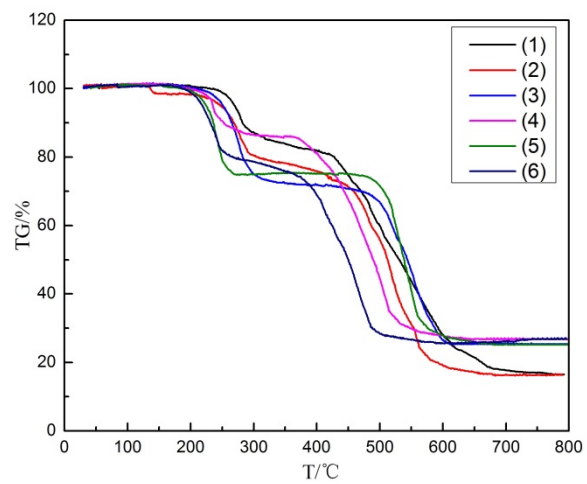

**Fig. S2.** The thermogravimetric analyses for complexes 1–6.

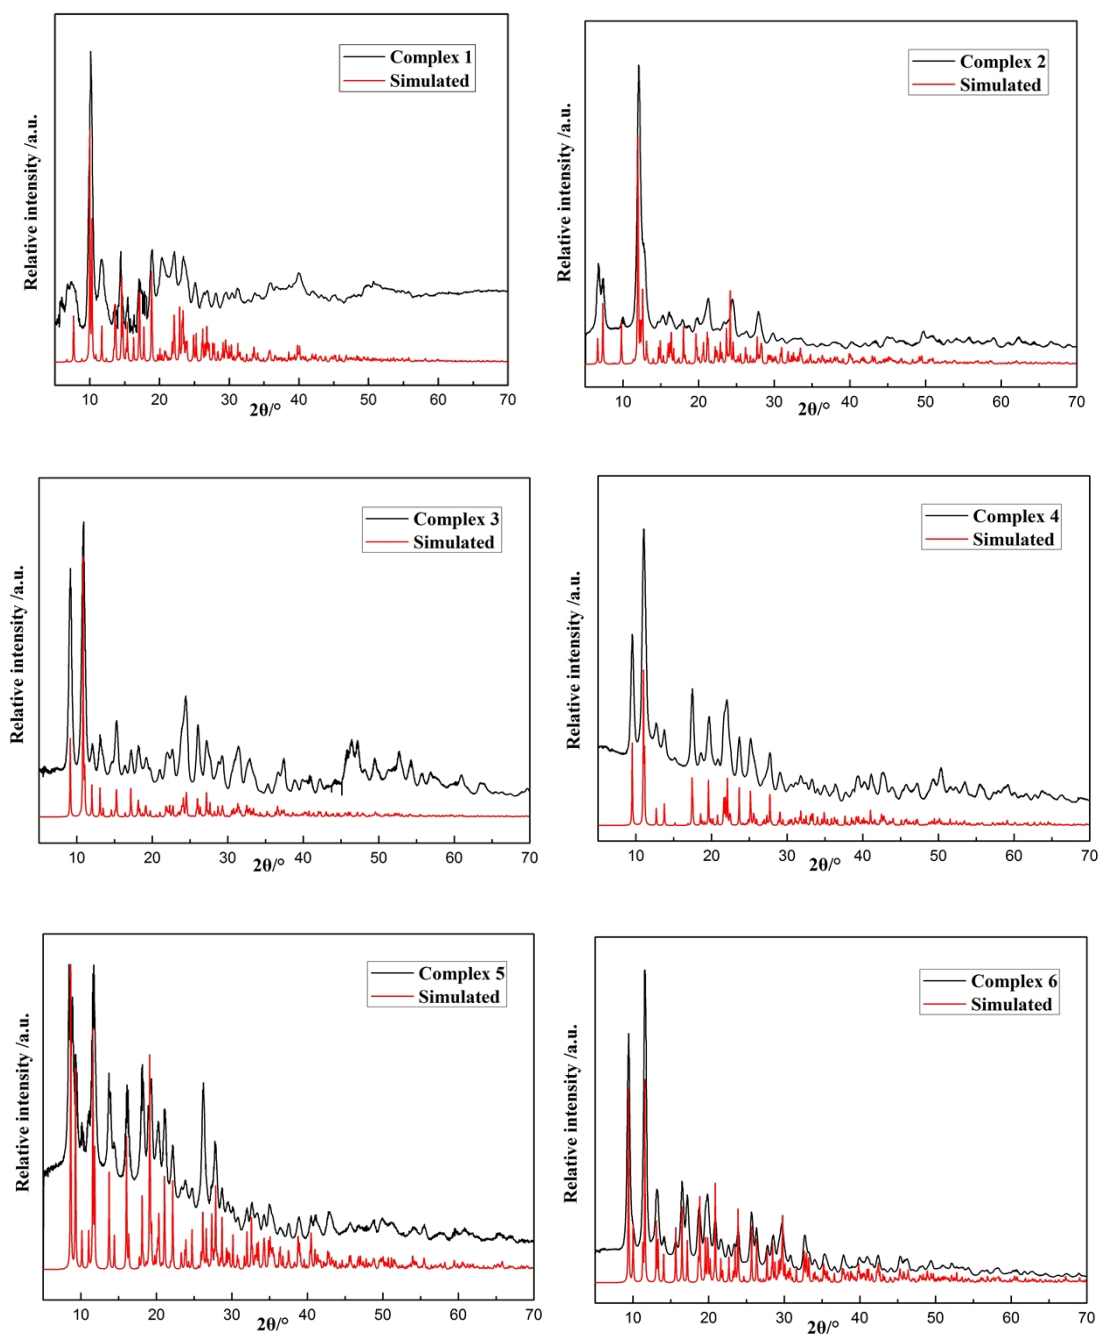

**Fig. S3.** Experimental (black) and simulated (red) powder x-ray diffraction patterns for complexes **1-6**.

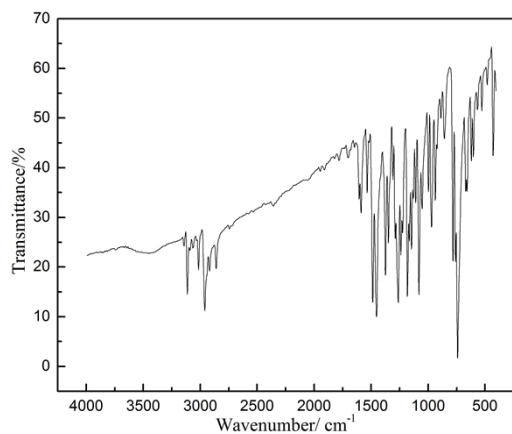

(1)

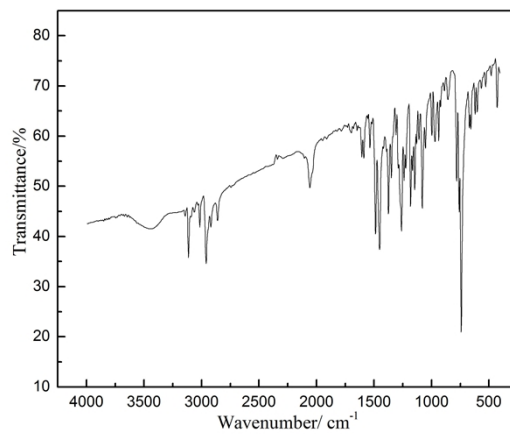

(2)

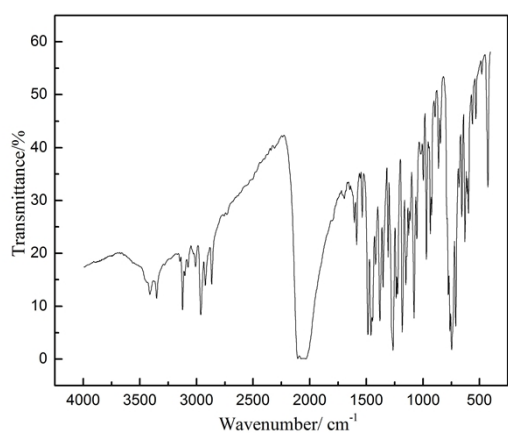

(3)

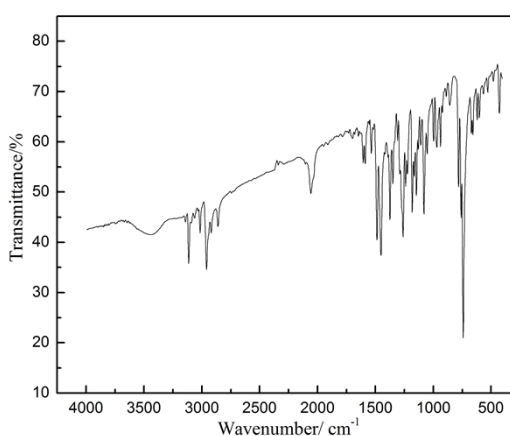

(4)

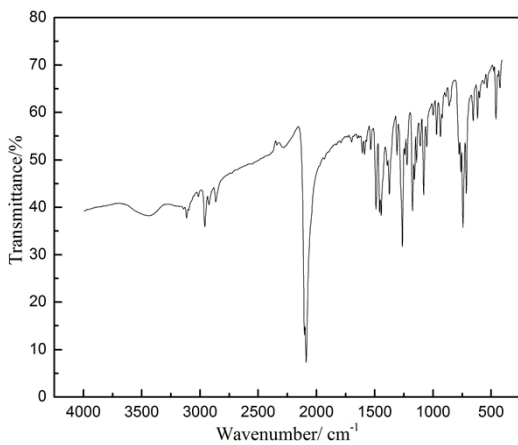

(5)

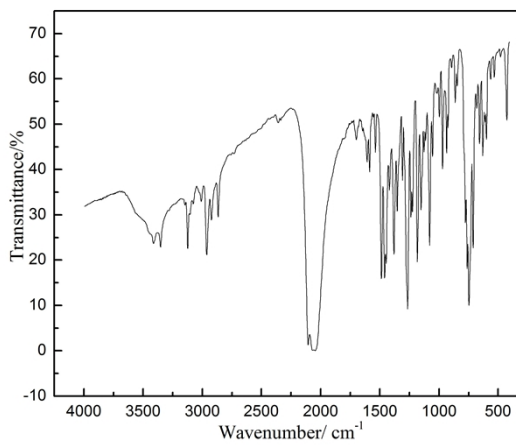

(6)

**Fig. S4.** The IR spectrum for complexes (1)-(6)

**Table S1.** Selected Bond Lengths [Å] and Angles [°] for Complexes (1)–(6)

|                                       |                                                                              |            |                          |            |           |
|---------------------------------------|------------------------------------------------------------------------------|------------|--------------------------|------------|-----------|
| (1)                                   | Cd–N5                                                                        | 2.2234(1)  | Cd–N10                   | 2.2321(1)  |           |
|                                       | Cd–Cl1                                                                       | 2.4319(1)  | Cd–Cl2                   | 2.4013(1)  |           |
|                                       | N5– Cd–N10                                                                   | 107.668(2) | N5– Cd– Cl1              | 105.406(3) |           |
|                                       | N10– Cd– Cl1                                                                 | 99.335(2)  | N10– Cd– Cl2             | 119.692(2) |           |
|                                       | Cl1– Cd– Cl2                                                                 | 111.197(2) |                          |            |           |
| (2)                                   | Cd–O1                                                                        | 2.4994(1)  | Cd –O3                   | 2.4235(1)  |           |
|                                       | Cd –O4                                                                       | 2.4453(1)  | Cd –O5                   | 2.5248(1)  |           |
|                                       | Cd1–N7 <sup>i</sup>                                                          | 2.2971(1)  | Cd –N3                   | 2.3427(1)  |           |
|                                       | Cd –N8                                                                       | 2.2800(1)  |                          |            |           |
|                                       | O1– Cd –O3                                                                   | 51.751(1)  | O1– Cd –O4               | 130.418(1) |           |
|                                       | O1– Cd –O5                                                                   | 170.303(2) | O1– Cd –N3               | 84.292(1)  |           |
|                                       | O1– Cd –N8                                                                   | 89.072(1)  | O1– Cd –N7 <sup>i</sup>  | 91.012(1)  |           |
|                                       | O3– Cd –O4                                                                   | 79.546(1)  | O3– Cd –O5               | 129.995(2) |           |
|                                       | O3– Cd –N3                                                                   | 88.344(1)  | O3– Cd –N8               | 140.752(2) |           |
|                                       | O3– Cd –N7 <sup>i</sup>                                                      | 81.685(1)  | O4– Cd –O5               | 50.497(1)  |           |
|                                       | O4– Cd –N3                                                                   | 85.786(1)  | O4– Cd –N8               | 139.414(2) |           |
|                                       | O4– Cd –N7 <sup>i</sup>                                                      | 90.459(1)  | O5– Cd –N3               | 86.215(1)  |           |
|                                       | O5– Cd –N8                                                                   | 88.967(1)  | O5– Cd –N7 <sup>i</sup>  | 98.674(1)  |           |
|                                       | N3– Cd –N8                                                                   | 90.086(2)  | N3– Cd –N7 <sup>i</sup>  | 169.839(2) |           |
|                                       | N8– Cd –N7 <sup>i</sup>                                                      | 98.863(1)  |                          |            |           |
|                                       | Symmetry transformation used to generate equivalent atoms: (i) x, 2–y, 0.5+z |            |                          |            |           |
|                                       | (3)                                                                          | Cd1–N11    | 2.3731(0)                | Cd1–N14    | 2.3478(0) |
| Cd1–O <sup>i</sup>                    |                                                                              | 2.4607(0)  | Cd1–Cl4 <sup>i</sup>     | 2.5112(0)  |           |
| Cd2–N1                                |                                                                              | 2.3542(0)  | Cd2–N10                  | 2.2953(0)  |           |
| Cd2–N11                               |                                                                              | 2.3554(0)  | Cd2–N14                  | 2.3500(0)  |           |
| Cd2–O2                                |                                                                              | 2.4281(0)  | Cd2–Cl1                  | 2.5586(0)  |           |
| O1 <sup>i</sup> –Cd1–Cl4 <sup>i</sup> |                                                                              | 168.987(0) | O1 <sup>i</sup> –Cd1–N11 | 80.873(0)  |           |
| O1 <sup>i</sup> –Cd1–N14              |                                                                              | 79.112(0)  | N11– Cd1–N14             | 78.791(0)  |           |
| N11– Cd1–Cl4                          |                                                                              | 89.178(0)  | N14–Cd1–Cl4              | 94.402(0)  |           |
| O2–Cd2–Cl1                            |                                                                              | 168.566(0) | O2–Cd2–N1                | 90.200(0)  |           |
| O2–Cd2–N10                            |                                                                              | 88.061(0)  | O2–Cd2–N11               | 79.750(0)  |           |
| O2–Cd2–N14                            |                                                                              | 81.117(0)  | N1–Cd2– Cl1              | 97.054(0)  |           |
| N1–Cd2–N10                            |                                                                              | 93.466(0)  | N1–Cd2–N11               | 166.618(0) |           |
| N1–Cd2–N14                            |                                                                              | 90.702(0)  | N10–Cd2– Cl1             | 100.255(0) |           |
| N10–Cd2– N11                          |                                                                              | 94.988(0)  | N10–Cd2– N14             | 168.418(0) |           |
| N11– Cd2–Cl1                          |                                                                              | 91.631(0)  | N11– Cd2–N14             | 79.104(0)  |           |
| N14– Cd2–Cl1                          |                                                                              | 89.935(0)  |                          |            |           |

---

Symmetry transformation used to generate equivalent atoms: (i)  $1+x, y, z$

|     |                                          |            |                             |            |
|-----|------------------------------------------|------------|-----------------------------|------------|
| (4) | Cd –N1                                   | 2.3817(1)  | Cd –N5 <sup>i</sup>         | 2.2857(1)  |
|     | Cd –Cl1                                  | 2.4751(1)  | Cd –Cl2                     | 2.5711(1)  |
|     | Cd –Cl2 <sup>ii</sup>                    | 2.6146(1)  |                             |            |
|     | N1– Cd – N5 <sup>i</sup>                 | 164.951(1) | N1– Cd – Cl1                | 90.579(1)  |
|     | N1– Cd – Cl2                             | 87.975(1)  | N1– Cd – Cl2 <sup>ii</sup>  | 79.361(1)  |
|     | N5 <sup>i</sup> – Cd – Cl1               | 103.626(1) | N5 <sup>i</sup> – Cd – Cl2  | 92.175(1)  |
|     | N5 <sup>i</sup> – Cd – Cl2 <sup>ii</sup> | 88.902(1)  | Cl1– Cd – Cl2               | 108.236(1) |
|     | Cl1– Cd – Cl2 <sup>ii</sup>              | 121.158(1) | Cl2– Cd – Cl2 <sup>ii</sup> | 128.796(1) |

Symmetry transformation used to generate equivalent atoms: (i)  $1+x, 1.5-y, 0.5+z$ ; (ii)  $x, 1.5-y, -0.5+z$ ;

|     |                                         |            |                                          |            |
|-----|-----------------------------------------|------------|------------------------------------------|------------|
| (5) | Cd –N1                                  | 2.3492(1)  | Cd –N5 <sup>i</sup>                      | 2.3761(1)  |
|     | Cd –N6 <sup>ii</sup>                    | 2.2915(1)  | Cd –N7 <sup>iii</sup>                    | 2.2804(1)  |
|     | Cd –S1                                  | 2.7174(1)  | Cd –S2                                   | 2.7863(1)  |
|     | N1– Cd –N5 <sup>i</sup>                 | 90.112(2)  | N1– Cd –N6 <sup>ii</sup>                 | 86.074(2)  |
|     | N1– Cd –N7 <sup>iii</sup>               | 97.740(2)  | N1– Cd –S1                               | 91.213(2)  |
|     | N1– Cd –S2                              | 171.466(1) | N5 <sup>i</sup> – Cd –N6 <sup>ii</sup>   | 174.947(3) |
|     | N5 <sup>i</sup> – Cd –N7 <sup>iii</sup> | 90.664(3)  | N5 <sup>i</sup> – Cd –S1                 | 83.400(2)  |
|     | N5 <sup>i</sup> – Cd –S2                | 91.392(1)  | N6 <sup>ii</sup> – Cd –N7 <sup>iii</sup> | 93.132(3)  |
|     | N6 <sup>ii</sup> – Cd –S1               | 93.356(3)  | N6 <sup>ii</sup> – Cd –S2                | 91.900(2)  |
|     | N7 <sup>iii</sup> – Cd –S1              | 169.279(3) | N7 <sup>iii</sup> – Cd –S2               | 90.643(2)  |
|     | S1– Cd –S2                              | 80.621(1)  |                                          |            |

Symmetry transformation used to generate equivalent atoms: (i)  $2-x, 1-y, 1-z$ ; (ii)  $1-x, 1-y, -z$ ; (iii)  $1-x, -y, -z$

|     |                                         |            |                             |           |
|-----|-----------------------------------------|------------|-----------------------------|-----------|
| (6) | Cd –N1 <sup>i</sup>                     | 2.3499(3)  | Cd –N5                      | 2.3705(2) |
|     | Cd –N6                                  | 2.3784(3)  | Cd –N8 <sup>ii</sup>        | 2.3733(4) |
|     | Cd –N9                                  | 2.3175(3)  | Cd –N11                     | 2.3359(2) |
|     | N1 <sup>i</sup> – Cd – N5               | 93.307(6)  | N1 <sup>i</sup> – Cd – N6   | 86.384(5) |
|     | N1 <sup>i</sup> – Cd – N8 <sup>ii</sup> | 170.415(7) | N1 <sup>i</sup> – Cd – N9   | 98.804(7) |
|     | N1 <sup>i</sup> – Cd – N11              | 89.000(6)  | N5– Cd – N6                 | 95.510(6) |
|     | N5– Cd – N8 <sup>ii</sup>               | 88.845(6)  | N5– Cd – N9                 | 86.446(6) |
|     | N5– Cd – N11                            | 174.685(7) | N6– Cd – N8 <sup>ii</sup>   | 84.112(6) |
|     | N6– Cd – N9                             | 174.359(7) | N6– Cd – N11                | 89.410(6) |
|     | N8 <sup>ii</sup> – Cd – N9              | 90.647(5)  | N8 <sup>ii</sup> – Cd – N11 | 89.663(5) |
|     | N9– Cd – N11                            | 88.471(6)  |                             |           |

Symmetry transformation used to generate equivalent atoms: (i)  $1-x, 1-y, 1-z$ ; (ii)  $-x, -$

---

**Table S2.** Selected hydrogen bonds lengths [Å] and angles [°] for compounds **(1)** and **(3)**.

|            | D–H···A                      | $d(\text{D–H})/\text{Å}$ | $d(\text{H···A})/\text{Å}$ | $d(\text{D···A})/\text{Å}$ | $\angle\text{DHA}$ |
|------------|------------------------------|--------------------------|----------------------------|----------------------------|--------------------|
| <b>(1)</b> | C7–H7A···Cl1                 | 0.97001(1)               | 2.4246(1)                  | 3.3248(2)                  | 129.292(3)         |
|            | C21–H21···Cl2                | 0.93001(1)               | 2.8505(1)                  | 3.6402(1)                  | 143.477(4)         |
| <b>(3)</b> | C7–H7A···Cl <sup>i</sup>     | 0.9701(0)                | 2.5456(0)                  | 3.4951(0)                  | 166.141(1)         |
|            | C7–H7B··· Cl14 <sup>ii</sup> | 0.9700(0)                | 2.6259(0)                  | 3.4438(0)                  | 142.175(1)         |

(ii) 2-x, 0.5+y, 1.5-z; (iii) 1-x, 1-y, 1-z.
